# Supplementary material for: An ultrahot Neptune in the Neptune desert
Source: Springer Nature journal article supplement (doi:10.1038/s41550-020-1142-z), 2020-09-14
Supplement: MOESM1 [file 41550_2020_1142_MOESM1_ESM.pdf]

---

**Supplementary information**

---

**An ultrahot Neptune in the Neptune desert**

---

In the format provided by the  
authors and unedited

**Supplementary Table 1: Stellar properties of LTT 9779**

|                                                   |                         |           |
|---------------------------------------------------|-------------------------|-----------|
| Alternative Names                                 | TIC 183985250           | TESS      |
|                                                   | HIP 117883              | HIPPARCOS |
|                                                   | 2MASS J23544020-3737408 | 2MASS     |
|                                                   | TYC 8015-1162-1         | TYCHO     |
| Catalogue Data                                    |                         |           |
| RA (J2000)                                        | 23h54m40.60s            | TESS      |
| DEC (J2000)                                       | -37d37m42.18s           | TESS      |
| $\text{pm}^{\text{RA}}$ (mas yr <sup>-1</sup> )   | 247.615±0.076           | GAIA      |
| $\text{pm}^{\text{DEC}}$ (mas yr <sup>-1</sup> )  | -69.801±0.062           | GAIA      |
| $\pi$ (mas)                                       | 12.403±0.049            | GAIA      |
| Photometric Data                                  |                         |           |
| T (mag)                                           | 9.10±0.02               | TESS      |
| B (mag)                                           | 10.55±0.04              | TYCHO     |
| V (mag)                                           | 9.76±0.03               | TYCHO     |
| G (mag)                                           | 9.6001±0.0003           | GAIA      |
| J (mag)                                           | 8.45±0.02               | 2MASS     |
| K (mag)                                           | 8.15±0.02               | 2MASS     |
| K <sub>s</sub> (mag)                              | 8.02±0.03               | 2MASS     |
| WISE1 (mag)                                       | 7.94±0.02               | WISE      |
| WISE2 (mag)                                       | 8.02±0.02               | WISE      |
| WISE3 (mag)                                       | 8.00±0.02               | WISE      |
| Spectroscopic, Photometric and Derived Properties |                         |           |
| T <sub>eff</sub> (K)                              | 5445±84                 | SPECIES   |
| log g (dex)                                       | 4.43±0.31               | SPECIES   |
| [Fe/H] (dex)                                      | +0.25±0.08              | SPECIES   |
| $v \sin i$ (km s <sup>-1</sup> )                  | 1.06±0.37               | SPECIES   |

|                                             |                                        |                  |
|---------------------------------------------|----------------------------------------|------------------|
| $v_{\text{mac}}$ (km s <sup>-1</sup> )      | 1.98±0.29                              | SPECIES          |
| $T_{\text{eff}}$ (K)                        | 5496±80                                | ZASPE            |
| log $g$ (dex)                               | 4.51±0.01                              | ZASPE            |
| [Fe/H] (dex)                                | +0.24±0.05                             | ZASPE            |
| $v \sin i$ (km s <sup>-1</sup> )            | 1.7±0.5                                | ZASPE            |
| $T_{\text{eff}}$ (K)                        | 5499±50                                | SPC              |
| log $g$ (dex)                               | 4.47±0.10                              | SPC              |
| [m/H] (dex)                                 | +0.31±0.08                             | SPC              |
| $v \sin i$ (km s <sup>-1</sup> )            | 2.2±0.5                                | SPC              |
| $T_{\text{eff}}$ (K)                        | 5443 <sup>+14</sup> <sub>-13</sub>     | ARIADNE          |
| log $g$ (dex)                               | 4.35 <sup>+0.16</sup> <sub>-0.12</sub> | ARIADNE          |
| [Fe/H] (dex)                                | +0.27±0.03                             | ARIADNE          |
| $M_*$ (M <sub>⊙</sub> )                     | 1.03 <sup>+0.03</sup> <sub>-0.04</sub> | SPECIES + MIST   |
| $M_*$ (M <sub>⊙</sub> )                     | 1.00 <sup>+0.02</sup> <sub>-0.03</sub> | YY + GAIA        |
| $M_*$ (M <sub>⊙</sub> )                     | 0.77 <sup>+0.29</sup> <sub>-0.21</sub> | ARIADNE          |
| $R_*$ (M <sub>⊙</sub> )                     | 0.95±0.01                              | SPECIES + MIST   |
| $R_*$ (M <sub>⊙</sub> )                     | 0.92±0.01                              | GAIA + this work |
| $R_*$ (M <sub>⊙</sub> )                     | 0.949±0.006                            | ARIADNE          |
| $L_*$ (M <sub>⊙</sub> )                     | 0.68±0.04                              | YY + GAIA        |
| $L_*$ (M <sub>⊙</sub> )                     | 0.71±0.01                              | ARIADNE          |
| MV (mag)                                    | 5.30±0.07                              | YY + GAIA        |
| Age (Gyr)                                   | 2.1 <sup>+2.2</sup> <sub>-1.4</sub>    | SPECIES + MIST   |
| Age (Gyr)                                   | 1.9 <sup>+1.7</sup> <sub>-1.2</sub>    | YY + GAIA        |
| $\rho_*$ (g cm <sup>-3</sup> )              | 1.81 <sup>+0.06</sup> <sub>-0.07</sub> | YY + GAIA        |
| Spectral Type                               | G7V                                    | This work        |
| $\langle S_{\text{HARPS}} \rangle$          | 0.148±0.008                            | This work        |
| $\langle \log R'_{\text{HK,HARPS}} \rangle$ | -5.10±0.04                             | This work        |

**Supplementary Table 2: Radial velocities of LTT 9779**

| JD - 2450000 | RV (m s <sup>-1</sup> ) | Uncertainty (m s <sup>-1</sup> ) | Instrument |
|--------------|-------------------------|----------------------------------|------------|
| 8429.51804   | -10.59                  | 0.86                             | HARPS      |
| 8430.54022   | -16.91                  | 0.74                             | HARPS      |
| 8430.59553   | -9.41                   | 0.68                             | HARPS      |
| 8430.67911   | 1.99                    | 0.79                             | HARPS      |
| 8430.76201   | 13.40                   | 1.21                             | HARPS      |
| 8431.51068   | 6.71                    | 0.61                             | HARPS      |
| 8431.64346   | 16.09                   | 0.83                             | HARPS      |
| 8431.69130   | 14.98                   | 0.87                             | HARPS      |
| 8431.73217   | 8.41                    | 0.55                             | HARPS      |
| 8432.50941   | 12.77                   | 0.73                             | HARPS      |
| 8432.65689   | -7.23                   | 0.94                             | HARPS      |
| 8432.69804   | -13.45                  | 1.06                             | HARPS      |
| 8432.72573   | -18.32                  | 4.02                             | HARPS      |
| 8464.53817   | -25.17                  | 1.02                             | HARPS      |
| 8464.64153   | -16.81                  | 1.11                             | HARPS      |
| 8464.68616   | -10.08                  | 1.27                             | HARPS      |
| 8465.53024   | 0.00                    | 0.85                             | HARPS      |
| 8465.59314   | 10.82                   | 0.84                             | HARPS      |
| 8465.64411   | 12.09                   | 0.86                             | HARPS      |
| 8465.68104   | 15.61                   | 1.12                             | HARPS      |
| 8466.52022   | 14.89                   | 1.03                             | HARPS      |
| 8466.58232   | 8.12                    | 0.90                             | HARPS      |
| 8466.63157   | 2.49                    | 1.09                             | HARPS      |

|            |        |      |         |
|------------|--------|------|---------|
| 8466.66865 | -2.85  | 1.10 | HARPS   |
| 8481.53213 | 14.93  | 0.94 | HARPS   |
| 8481.57805 | 12.72  | 0.84 | HARPS   |
| 8482.53643 | -8.75  | 0.74 | HARPS   |
| 8482.57255 | -11.89 | 0.82 | HARPS   |
| 8482.60140 | -16.09 | 0.90 | HARPS   |
| 8483.52686 | -24.82 | 0.80 | HARPS   |
| 8483.59338 | -20.68 | 1.12 | HARPS   |
| 8483.61557 | -18.95 | 0.93 | HARPS   |
| <hr/>      |        |      |         |
| 8438.56440 | -14.80 | 4.50 | CORALIE |
| 8438.62857 | -7.40  | 4.60 | CORALIE |
| 8438.72084 | 10.40  | 5.00 | CORALIE |
| 8439.56828 | 35.30  | 5.60 | CORALIE |
| 8439.64481 | 3.80   | 4.80 | CORALIE |
| 8439.70910 | -11.70 | 5.20 | CORALIE |
| 8440.56824 | 4.90   | 4.70 | CORALIE |
| 8440.64498 | -13.20 | 4.70 | CORALIE |
| 8440.70927 | -27.70 | 5.00 | CORALIE |
| 8441.57027 | -16.30 | 4.20 | CORALIE |
| 8441.66132 | -17.50 | 4.60 | CORALIE |
| 8441.74898 | 1.00   | 4.50 | CORALIE |
| 8442.56932 | -0.60  | 4.50 | CORALIE |
| 8442.64202 | 11.60  | 4.90 | CORALIE |
| 8442.70651 | 0.60   | 5.00 | CORALIE |
| 8443.57400 | 20.10  | 5.00 | CORALIE |
| 8443.64711 | -0.70  | 4.70 | CORALIE |
| 8443.71686 | 5.60   | 4.80 | CORALIE |

---
